# Supplementary material for: Optimizing maximum carboxylation rate for North America’s boreal forests in the Canadian Land Surface Scheme Including Biogeochemical Cycles (CLASSIC) v.1.3
Source: Copernicus journal article supplement (doi:10.5194/egusphere-2023-1167), 2023-07-19
Supplement: Supplementary file 1 [file egusphere-2023-1167-supplement.pdf]

## Supplementary materials

### **Text S1. Tree-structured Parzen estimator optimization**

All “single-site” and “all-sites” optimizations reached a convergence in the first 200 iterations (Fig. S1 and S2). The mean optimization cost substantially reduced after fluctuations in the first 100 trials, indicating the obvious advance toward finding the optimized PFT- $V_{max25}$ . The fluctuations of the mean optimization cost in the first 100 trials also indicated that the optimizations were performed through extensive explorations of model performance.

### **Text S2. Global data products of gross primary production and evapotranspiration**

We extracted stand-level estimates from various gridded global data products of gross primary production and evapotranspiration (Table 1). All the estimates employed here were evaluated over North America’s boreal biome in previous studies. We acknowledge that the gridded data products may be produced based on replicated observations (e.g., the MODIS products) and were not fully independent. However, we treated all data products as independent data because they were produced separately based on independent protocols.

**Table S1.** CLASSIC parameters for estimating the maximum carboxylation rate ( $V_{cmax}$ ) from  $V_{cmax25}$  ( $V_{cmax}$  at 25 °C;  $\mu\text{mol CO}_2 \text{ m}^{-2} \text{ s}^{-1}$ ).  $T_{lower}$  and  $T_{upper}$  (°C) are the lower and upper temperature thresholds for photosynthesis (Melton and Arora, 2016; Meyer et al., 2021).

| Plant functional type           | $V_{cmax25}$ | $T_{lower}$ | $T_{upper}$ |
|---------------------------------|--------------|-------------|-------------|
| Evergreen Needleleaf Tree (ENT) | 42           | -5          | 34          |
| Deciduous Needleleaf Tree (DNT) | 47           | -5          | 34          |
| Evergreen Broadleaf Shrub (EBS) | 60           | -2          | 34          |
| Deciduous Broadleaf Shrub (DBS) | 60           | -2          | 34          |
| C3 grass (C3G)                  | 55           | -1          | 40          |
| Sedge (SDG)                     | 40           | -1          | 40          |

**Table S2.** Study boreal forest stands. 30-year climate normals of mean annual air temperature (MAAT) and mean annual total precipitation (MATP) (Qu et al., 2022). Site names refer to AmeriFlux ID and sites are in a latitudinal order from south (CA-Qfo) to north (CA-HPC). Permafrost is isolated ( $\leq 10$  % in areal extent), sporadic ( $>10 - 50$  %), discontinuous ( $>50 - 90$  %), and continuous ( $>90$  %).

| Site (AmeriFlux-ID) | Name                                                                     | Latitude | Longitude | MAAT     | MATP   | Permafrost    |
|---------------------|--------------------------------------------------------------------------|----------|-----------|----------|--------|---------------|
| CA-Qfo              | Quebec - Eastern Boreal, Mature Black Spruce                             | 49.69    | -74.34    | 0.2 °C   | 929 mm | Absent        |
| CA-Obs              | Saskatchewan - Western Boreal, Mature Black Spruce                       | 53.99    | -105.12   | 1.1 °C   | 474 mm | Absent        |
| CA-Man              | Manitoba - Northern Old Black Spruce (former BOREAS Northern Study Area) | 55.88    | -98.48    | -1.7 °C  | 324 mm | Absent        |
| CA-SMC              | Smith Creek                                                              | 63.15    | -123.25   | -2.8 °C  | 389 mm | Discontinuous |
| US-BZS              | Bonanza Creek Black Spruce                                               | 64.70    | -148.32   | -2.0 °C  | 280 mm | Discontinuous |
| US-Uaf              | University of Alaska, Fairbanks                                          | 64.87    | -147.86   | -3.9 °C, | 367 mm | Discontinuous |
| US-Prr              | Poker Flat Research Range Black Spruce Forest                            | 65.12    | -147.49   | -2.9 °C  | 391 mm | Discontinuous |
| CA-HPC              | Havikpak Creek                                                           | 68.32    | -133.52   | -6.8 °C  | 235 mm | Continuous    |

**Table S3.** Maximum carboxylation rate at 25 °C ( $V_{cmax25}$ ;  $\mu\text{mol CO}_2 \text{ m}^{-2} \text{ s}^{-1}$ ) obtained from leaf-level gas exchange measurements (Sect. 2.4). Plant functional types (PFTs) are “evergreen needleleaf tree” (ENT), “deciduous needleleaf tree” (DNT), “evergreen broadleaf shrub” (EBS), “deciduous broadleaf shrub” (DBS), “C3 grass” (C3G), and “sedge” (SDG). An asterisk (\*) indicates that the measurements were standardized to 25 °C using an Arrhenius function (Smith et al., 2019; Kattge and Knorr, 2007).

| PFT | Plant species                     | $V_{cmax25}$ | Measured periods | Location              | Source                   |
|-----|-----------------------------------|--------------|------------------|-----------------------|--------------------------|
| ENT | <i>Picea mariana</i>              | 46.5 ± 9.6   | June–October     | Balsam, MN, USA       | Jensen et al. (2019)     |
| ENT | <i>Picea mariana</i>              | 39.0 ± 6.4   | July             | Guelph, ON, CA        | Smith and Dukes (2017)   |
| ENT | <i>Picea mariana</i>              | 24.6 ± 4.0   | July             | Timmins, ON, CA       | Smith and Dukes (2017)   |
| ENT | <i>Picea mariana</i>              | 25.6 ± 8.8*  | July             | Prince Albert, SK, CA | Rayment et al. (2002)    |
| ENT | <i>Picea mariana</i>              | 19.7 ± 5.3*  | May–September    | Nelson House, MB, CA  | Dang et al. (1998)       |
| ENT | <i>Picea mariana</i>              | 25.1 ± 3.8   | July–August      | Fort Greely, AK, USA  | Ueyama et al. (2018)     |
| ENT | <i>Picea mariana</i>              | 30.4 ± 8.6   | August           | Deltana, AK, USA      | Smith and Dukes (2017)   |
| ENT | <i>Picea mariana</i>              | 26.2 ± 9.6   | July–August      | Fairbanks, AK, USA    | Ueyama et al. (2018)     |
| ENT | <i>Pinus banksiana</i>            | 25.5 ± 6.1*  | May–September    | Nelson House, MB, CA  | Dang et al. (1998)       |
| DNT | <i>Larix laricina</i>             | 45.9 ± 29.2  | June–October     | Balsam, MN, USA       | Jensen et al. (2019)     |
| DNT | <i>Larix laricina</i>             | 38.3 ± 8.0   | July             | Guelph, ON, CA        | Smith and Dukes (2017)   |
| DNT | <i>Larix laricina</i>             | 33.4 ± 8.8   | July             | Timmins, ON, CA       | Smith and Dukes (2017)   |
| DNT | <i>Larix laricina</i>             | 42.8 ± 12.6  | August           | Deltana, AK, USA      | Smith and Dukes (2017)   |
| EBS | <i>Chamaedaphne calyculata</i>    | 43.2 ± 8.2   | June–October     | Balsam, MN, USA       | Jensen et al. (2019)     |
| EBS | <i>Rhododendron groenlandicum</i> | 37.8 ± 2.8   | June–October     | Balsam, MN, USA       | Jensen et al. (2019)     |
| EBS | <i>Vaccinium myrtilloides</i>     | 84.6 ± 13.5  | July–August      | Wakefield, ON, CA     | Bubier et al. (2011)     |
| EBS | <i>Ledum groenlandicum</i>        | 78.1 ± 13.4  | July–August      | Wakefield, ON, CA     | Bubier et al. (2011)     |
| EBS | <i>Rhododendron ferrugineum</i>   | 35           | May–September    | Antras, OCC, FR       | Pornon and Lamaze (2007) |
| EBS | <i>Ledum groenlandicum</i>        | 47.8 ± 16.8  | July–August      | Fairbanks, AK, USA    | Ueyama et al. (2018)     |
| DBS | <i>Kalmia polifolia</i>           | 67.7 ± 22.8  | June–October     | Balsam, MN, USA       | Jensen et al. (2019)     |
| DBS | <i>Vaccinium angustifolium</i>    | 36.3 ± 1.8   | June–October     | Balsam, MN, USA       | Jensen et al. (2019)     |
| DBS | <i>Vaccinium myrtillus</i>        | 20.7*        | June–July        | Cavedine, TN, IT      | Wohlfahrt et al. (1999)  |
| DBS | <i>Vaccinium uliginosum</i>       | 62*          | June–July        | Innsbruck, TR, AT     | Wohlfahrt et al. (1999)  |
| DBS | <i>Betula glandulosa</i>          | 58.3 ± 6.4   | July–August      | Fairbanks, AK, USA    | Ueyama et al. (2018)     |
| DBS | <i>Betula nana</i>                | 37.3 ± 9.3   | June–July        | Toolik lake, AK, USA  | Heskel et al. (2013)     |

|     |                                 |             |             |                      |                      |
|-----|---------------------------------|-------------|-------------|----------------------|----------------------|
| DBS | <i>Salix pulchra</i>            | 103.5       | July–August | Barrow, AK, USA      | Rogers et al. (2017) |
| SDG | <i>Eriophorum vaginatum</i>     | 20.0 ± 11.0 | June–July   | Toolik lake, AK, USA | Heskel et al. (2013) |
| SDG | <i>Carex aquatilis</i>          | 87.3        | July–August | Barrow, AK, USA      | Rogers et al. (2017) |
| SDG | <i>Eriophorum angustifolium</i> | 71.9        | July–August | Barrow, AK, USA      | Rogers et al. (2017) |
| C3G | <i>Arctagrostis latifolia</i>   | 85.5        | July–August | Barrow, AK, USA      | Rogers et al. (2017) |
| C3G | <i>Arctophila fulva</i>         | 113         | July–August | Barrow, AK, USA      | Rogers et al. (2017) |
| C3G | <i>Dupontia fisheri</i>         | 69          | July–August | Barrow, AK, USA      | Rogers et al. (2017) |

---

**Table S4.** Model performance (mean  $\pm$  standard deviation) in root mean square deviation (RMSD) and Pearson correlation coefficient (r) using the prior and optimized plant functional type (PFT)- $V_{cmax25}$  compared with eddy covariance observations of gross primary production (GPP) and evapotranspiration (ET). The units of RMSD are g C m<sup>-2</sup> day<sup>-1</sup> for GPP and mm day<sup>-1</sup> for ET. Site names refer to AmeriFlux ID and sites are in a latitudinal order from south (CA-Qfo) to north (CA-HPC) (Table S2).

| Flux | Statistical metrics | PFT- $V_{cmax25}$ | CA-Qfo          | CA-Obs          | CA-Man          | CA-SMC          | US-BZS          | US-Uaf          | US-Prr          | CA-HPC          |                 |
|------|---------------------|-------------------|-----------------|-----------------|-----------------|-----------------|-----------------|-----------------|-----------------|-----------------|-----------------|
| GPP  | RMSD                | “single-site”     | 2.0 $\pm$ 1.3   | 1.9 $\pm$ 0.9   | 1.5 $\pm$ 0.6   | 1.9 $\pm$ 1.0   | 2.3 $\pm$ 1.6   | 2.9 $\pm$ 1.0   | 0.9 $\pm$ 0.4   | 2.5 $\pm$ 1.9   |                 |
|      |                     | “all-sites”       | 2.0 $\pm$ 1.3   | 1.9 $\pm$ 0.9   | 1.6 $\pm$ 0.7   | 2.1 $\pm$ 1.1   | 2.3 $\pm$ 1.1   | 2.9 $\pm$ 0.9   | 1.1 $\pm$ 0.4   | 2.6 $\pm$ 2.0   |                 |
|      |                     | prior             | 3.5             | 2.4             | 2               | 3.1             | 2.8             | 2.8             | 1.2             | 4.4             |                 |
|      | r                   | “single-site”     | 0.89 $\pm$ 0.01 | 0.88 $\pm$ 0.01 | 0.88 $\pm$ 0.04 | 0.78 $\pm$ 0.01 | 0.93 $\pm$ 0.00 | 0.80 $\pm$ 0.03 | 0.90 $\pm$ 0.01 | 0.90 $\pm$ 0.01 |                 |
|      |                     | “all-sites”       | 0.88 $\pm$ 0.01 | 0.87 $\pm$ 0.02 | 0.88 $\pm$ 0.03 | 0.77 $\pm$ 0.02 | 0.93 $\pm$ 0.01 | 0.83 $\pm$ 0.02 | 0.89 $\pm$ 0.01 | 0.90 $\pm$ 0.01 |                 |
|      |                     | prior             | 0.87            | 0.86            | 0.82            | 0.79            | 0.93            | 0.83            | 0.89            | 0.90            |                 |
|      | ET                  | RMSD              | “single-site”   | 0.91 $\pm$ 0.31 | 0.77 $\pm$ 0.15 | 0.74 $\pm$ 0.08 | 0.64 $\pm$ 0.05 | 0.57 $\pm$ 0.10 | 0.55 $\pm$ 0.05 | 0.44 $\pm$ 0.03 | 0.70 $\pm$ 0.11 |
|      |                     |                   | “all-sites”     | 0.95 $\pm$ 0.29 | 0.80 $\pm$ 0.19 | 0.75 $\pm$ 0.08 | 0.70 $\pm$ 0.08 | 0.53 $\pm$ 0.08 | 0.59 $\pm$ 0.07 | 0.46 $\pm$ 0.03 | 0.76 $\pm$ 0.12 |
|      |                     |                   | prior           | 1.42            | 1.12            | 0.85            | 0.69            | 0.51            | 0.57            | 0.43            | 0.94            |
| r    |                     | “single-site”     | 0.81 $\pm$ 0.01 | 0.80 $\pm$ 0.04 | 0.83 $\pm$ 0.02 | 0.86 $\pm$ 0.02 | 0.90 $\pm$ 0.01 | 0.85 $\pm$ 0.04 | 0.92 $\pm$ 0.01 | 0.81 $\pm$ 0.06 |                 |
|      |                     | “all-sites”       | 0.81 $\pm$ 0.02 | 0.84 $\pm$ 0.03 | 0.83 $\pm$ 0.02 | 0.86 $\pm$ 0.03 | 0.90 $\pm$ 0.01 | 0.84 $\pm$ 0.04 | 0.92 $\pm$ 0.02 | 0.81 $\pm$ 0.07 |                 |
|      |                     | prior             | 0.78            | 0.84            | 0.84            | 0.9             | 0.91            | 0.9             | 0.92            | 0.88            |                 |

**Table S5.** Root mean square deviation (RMSD) averaged among study sites comparing CLASSIC simulations using the prior and optimized plant functional type (PFT)- $V_{cmax25}$  with the corresponding stand-level estimates of gross primary production (GPP) and evapotranspiration (ET). The corresponding estimates are BESS (Li et al., 2021), MODIS-Z (Zhang et al., 2017), MODIS-OD (Running and Zhao, 2021), GLASS (Liang et al., 2021), GOSIF (Li and Xiao, 2019), CLASS (Hobeichi et al., 2020) (Table 1). The units of RMSD are  $\text{g C m}^{-2} \text{ day}^{-1}$  for GPP and  $\text{mm day}^{-1}$  for ET.

| Flux | PFT- $V_{cmax25}$ | BESS | MODIS-OD | MODIS-Z | GLASS | GOSIF | CLASS | Average |
|------|-------------------|------|----------|---------|-------|-------|-------|---------|
| GPP  | “single-site”     | 1.34 | 1.12     | 1.39    | 0.98  | 1.23  | /     | 1.22    |
|      | “all-sites”       | 1.19 | 1.06     | 1.13    | 1.10  | 1.02  | /     | 1.11    |
|      | prior             | 2.93 | 2.56     | 3.06    | 1.78  | 2.82  | /     | 2.69    |
| ET   | “single-site”     | 0.90 | 0.56     | /       | /     | /     | 0.53  | 0.69    |
|      | “all-sites”       | 0.92 | 0.58     | /       | /     | /     | 0.56  | 0.71    |
|      | prior             | 1.03 | 0.66     | /       | /     | /     | 0.64  | 0.80    |

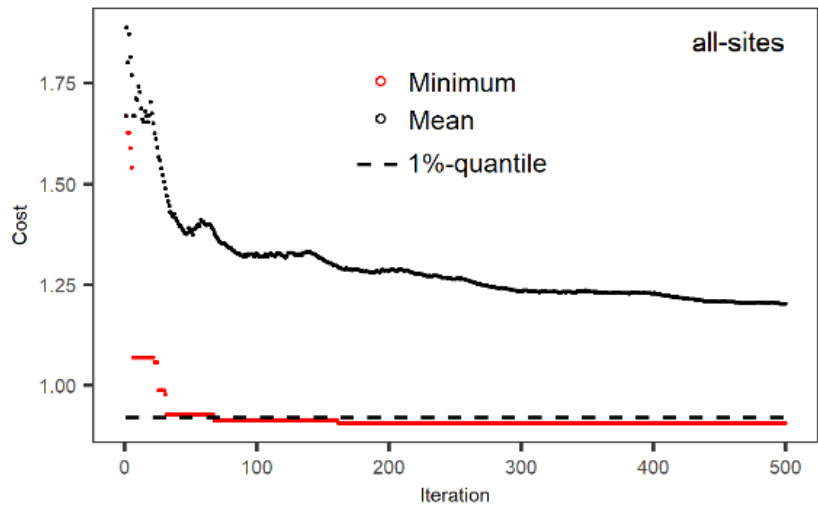

**Figure S1.** Optimization cost of “all-sites” optimization found before each iteration (Eq. [3] and Sect. 2.3). The dashed line is the 1 % quantile of the minimum cost.



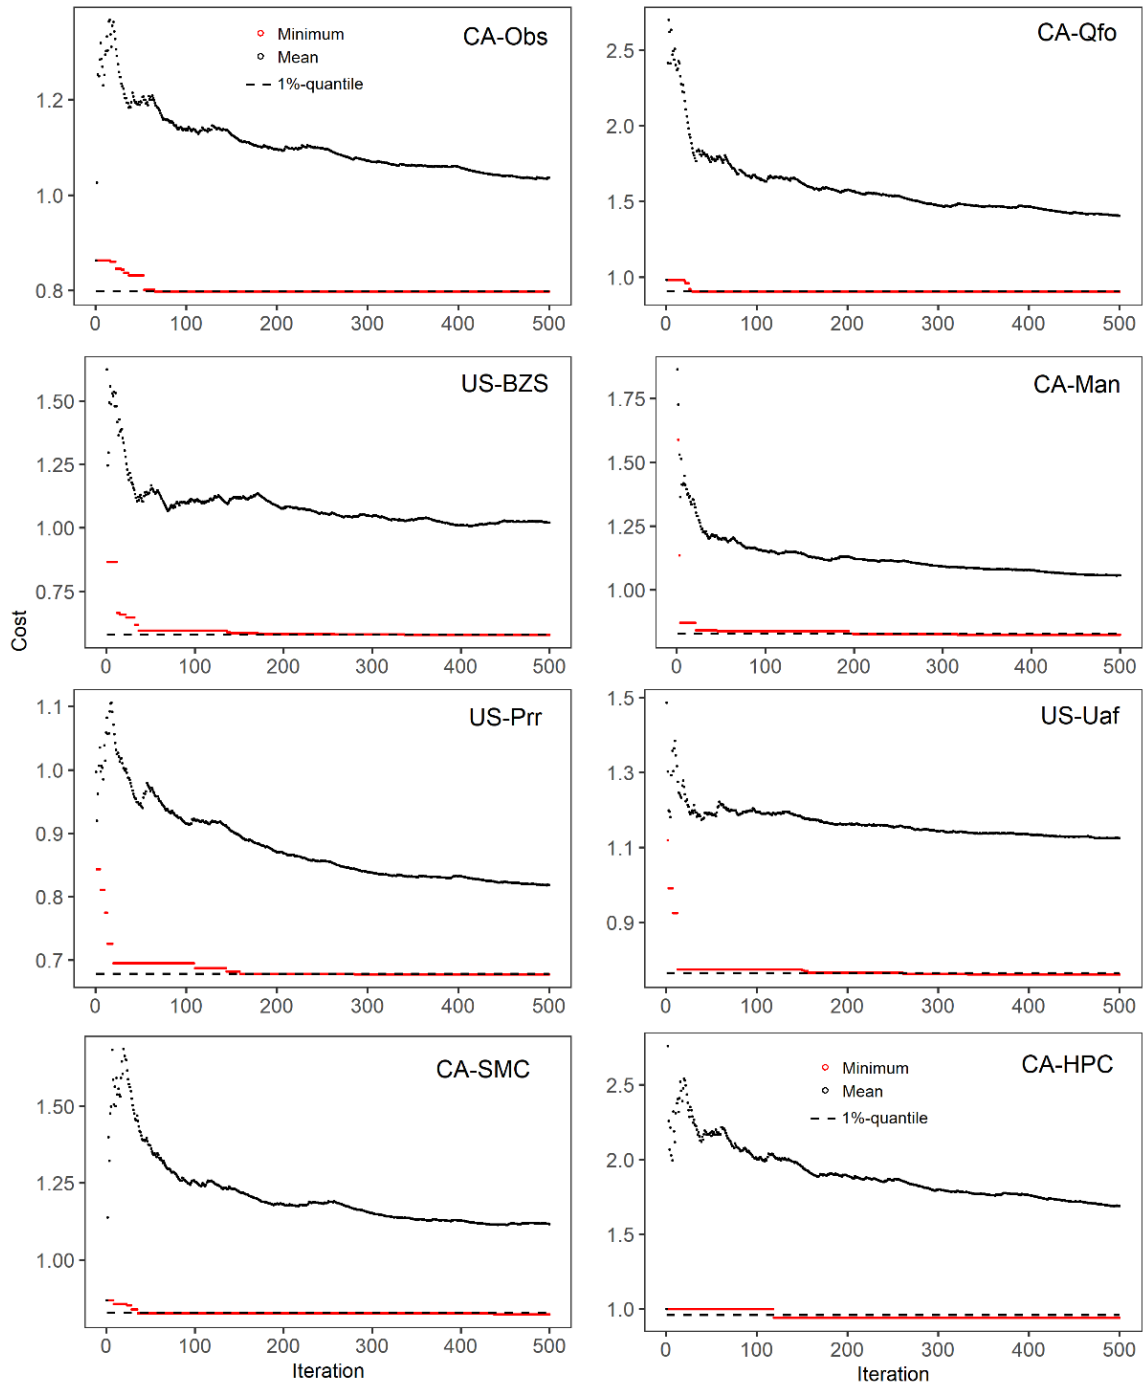

**Figure S2.** Optimization cost of “single-site” optimizations found before each iteration (Eq. [3] in Sect. 2.3). The dashed line is 1 % quantile of the minimum cost.

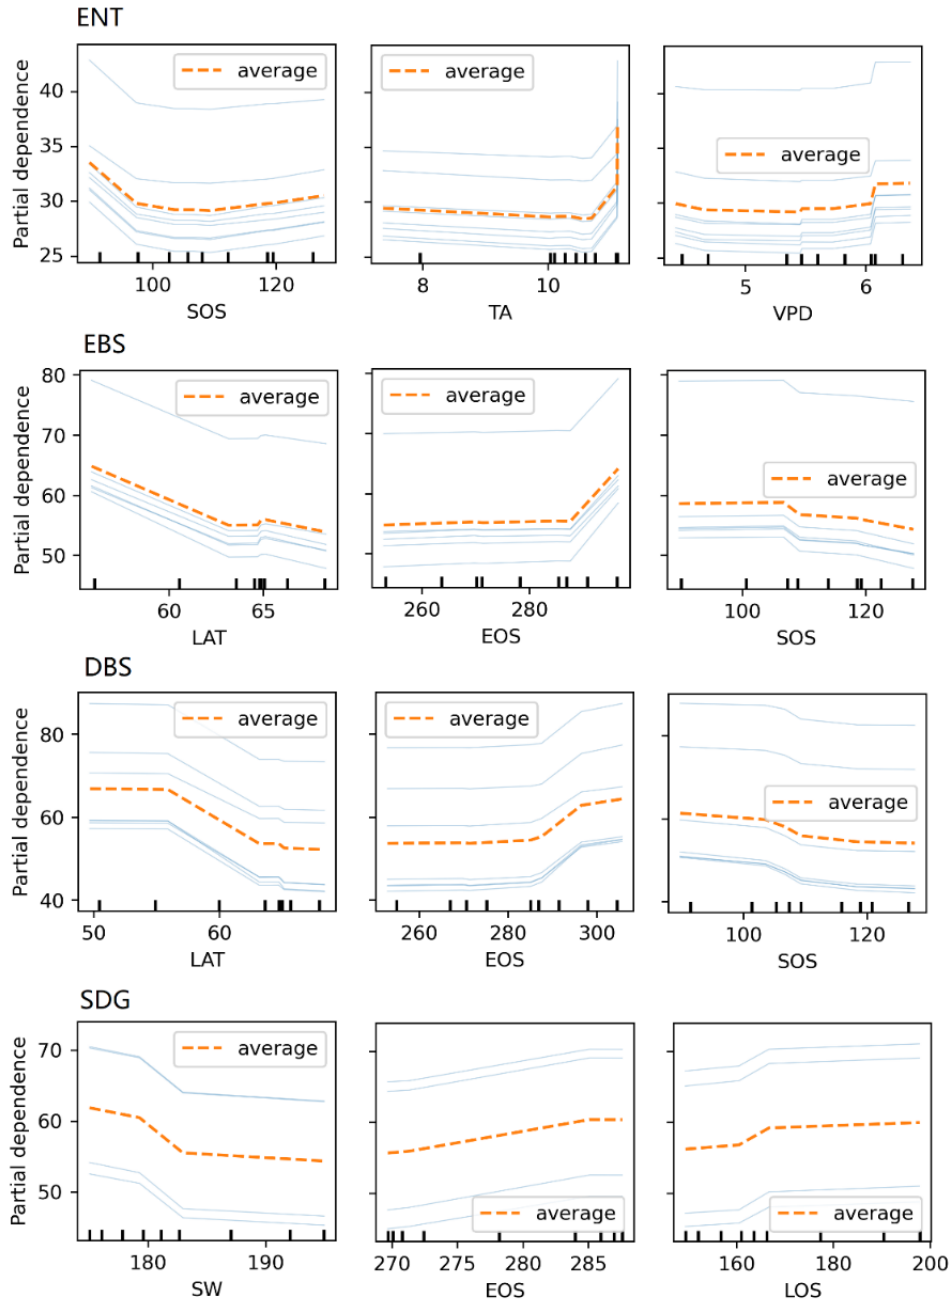

**Figure S3.** Partial dependence plots of the three most important predictors derived from random forest analyses (Sect. 2.5 and Table 2). Predictors include start (SOS, day of year), end (EOS, day of year), and duration (LOS, days) of growing seasons, latitude (LAT, °), incoming shortwave radiation (SW,  $W m^{-2}$ ), air temperature (TA, °C), and vapor pressure deficit (VPD, hPa). CLASSIC plant functional types are “evergreen needleleaf tree” (ENT), “evergreen broadleaf shrub” (EBS), “deciduous broadleaf shrub” (DBS), and “sedge” (SDG).

## References

- Bubier, J. L., Smith, R., Juutinen, S., Moore, T. R., Minocha, R., Long, S., and Minocha, S.: Effects of nutrient addition on leaf chemistry, morphology, and photosynthetic capacity of three bog shrubs, *Oecologia*, 167, 355-368, <https://doi.org/10.1007/s00442-011-1998-9>, 2011.
- Dang, Q.-L., Margolis, H. A., and Collatz, G. J.: Parameterization and testing of a coupled photosynthesis–stomatal conductance model for boreal trees, *Tree physiol.*, 18, 141-153, <https://doi.org/10.1093/treephys/18.3.141>, 1998.
- Heskel, M. A., Bitterman, D., Atkin, O. K., Turnbull, M. H., and Griffin, K. L.: Seasonality of foliar respiration in two dominant plant species from the Arctic tundra: response to long-term warming and short-term temperature variability, *Funct. Plant Biol.*, 41, 287-300, <https://doi.org/10.1071/FP13137>, 2013.
- Hobeichi, S., Abramowitz, G., and Evans, J.: Conserving Land–Atmosphere Synthesis Suite (CLASS), *J. Climate*, 33, 1821-1844, <https://doi.org/10.1175/JCLI-D-19-0036.1>, 2020.
- Jensen, A. M., Warren, J. M., King, A. W., Ricciuto, D. M., Hanson, P. J., and Wullschleger, S. D.: Simulated projections of boreal forest peatland ecosystem productivity are sensitive to observed seasonality in leaf physiology, *Tree Physiol.*, 39, 556-572, <https://doi.org/10.1093/treephys/tpy140>, 2019.
- Kattge, J. and Knorr, W.: Temperature acclimation in a biochemical model of photosynthesis: a reanalysis of data from 36 species, *Plant Cell Environ.*, 30, 1176-1190, <https://doi.org/10.1111/j.1365-3040.2007.01690.x>, 2007.
- Li, B., Ryu, Y., Jiang, C., Dechant, B., Liu, J., and Yan, Y.: BESS v2.0: A Satellite-driven and Coupled-process Model for Quantifying Global Land-atmosphere Radiation, Energy and CO<sub>2</sub> Fluxes since 1982, AGU Fall Meeting 2021, New Orleans, LA, 13-17 December 2021, B15D-1463, 2021.
- Li, X. and Xiao, J.: A global, 0.05-degree product of solar-induced chlorophyll fluorescence derived from OCO-2, MODIS, and reanalysis data, *Remote Sens.*, 11, 517, <https://doi.org/10.3390/rs11050517>, 2019.
- Liang, S., Cheng, J., Jia, K., Jiang, B., Liu, Q., Xiao, Z., Yao, Y., Yuan, W., Zhang, X., and Zhao, X.: The global land surface satellite (GLASS) product suite, *B. Am. Meteorol. Soc.*, 102, E323-E337, <https://doi.org/10.1175/BAMS-D-18-0341.1>, 2021.
- Melton, J. R. and Arora, V. K.: Competition between plant functional types in the Canadian Terrestrial Ecosystem Model (CTEM) v.2.0, *Geosci. Model Dev.*, 9, 323-361, <https://doi.org/10.5194/gmd-9-323-2016>, 2016.
- Meyer, G., Humphreys, E. R., Melton, J. R., Cannon, A. J., and Lafleur, P. M.: Simulating shrubs and their energy and carbon dioxide fluxes in Canada's Low Arctic with the Canadian Land Surface Scheme Including Biogeochemical Cycles (CLASSIC), *Biogeosciences*, 18, 3263-3283, <https://doi.org/10.5194/bg-18-3263-2021>, 2021.
- Pornon, A. and Lamaze, T.: Nitrogen resorption and photosynthetic activity over leaf life span in an evergreen shrub, *Rhododendron ferrugineum*, in a subalpine environment, *New Phytol.*, 175, 301-310, <https://doi.org/10.1111/j.1469-8137.2007.02101.x>, 2007.
- Qu, B., Sonnentag, O., Roy, A., Melton, J. R., Black, T. A., Amiro, B., Euskirchen, E. S., Ueyama, M., Kobayashi, H., Schulze, C., Gosselin, G. H., and Cannon, A. J.: A boreal forest model benchmarking dataset for North America: a case study with the Canadian Land Surface Scheme including Biogeochemical Cycles (CLASSIC), Zenodo [data set], <https://doi.org/10.5281/zenodo.7266010>, 2022.

- Rayment, M., Loustau, D., and Jarvis, P.: Photosynthesis and respiration of black spruce at three organizational scales: shoot, branch and canopy, *Tree Physiol.*, 22, 219-229, <https://doi.org/10.1093/treephys/22.4.219>, 2002.
- Rogers, A., Serbin, S. P., Ely, K. S., Sloan, V. L., and Wullschleger, S. D.: Terrestrial biosphere models underestimate photosynthetic capacity and CO<sub>2</sub> assimilation in the Arctic, *New Phytol.*, 216, 1090-1103, <https://doi.org/10.1111/nph.14740>, 2017.
- Running, S. and Zhao, M.: MOD17A2HGF MODIS/Terra Gross Primary Productivity Gap-Filled 8-Day L4 Global 500 m SIN Grid V061, NASA EOSDIS Land Processes DAAC [data set], <https://doi.org/10.5067/MODIS/MOD17A2HGF.061>, 2021.
- Smith, N. G. and Dukes, J. S.: LCE: Leaf carbon exchange data set for tropical, temperate, and boreal species of North and Central America, *Ecology*, 98, 2978, <https://doi.org/10.1002/ecy.1992>, 2017.
- Smith, N. G., Keenan, T. F., Colin Prentice, I., Wang, H., Wright, I. J., Niinemets, Ü., Crous, K. Y., Domingues, T. F., Guerrieri, R., and Yoko Ishida, F.: Global photosynthetic capacity is optimized to the environment, *Ecol. Lett.*, 22, 506-517, <https://doi.org/10.1111/ele.13210>, 2019.
- Ueyama, M., Tahara, N., Nagano, H., Makita, N., Iwata, H., and Harazono, Y.: Leaf-and ecosystem-scale photosynthetic parameters for the overstory and understory of boreal forests in interior Alaska, *J. Agric. Meteorol.*, 74, 79-86, <https://doi.org/10.2480/agrmet.D-17-00031>, 2018.
- Wohlfahrt, G., Bahn, M., Haubner, E., Horak, I., Michaeler, W., Rottmar, K., Tappeiner, U., and Cernusca, A.: Inter-specific variation of the biochemical limitation to photosynthesis and related leaf traits of 30 species from mountain grassland ecosystems under different land use, *Plant Cell Environ.*, 22, 1281-1296, <https://doi.org/10.1046/j.1365-3040.1999.00479.x>, 1999.
- Zhang, Y., Xiao, X., Wu, X., Zhou, S., Zhang, G., Qin, Y., and Dong, J.: A global moderate resolution dataset of gross primary production of vegetation for 2000–2016, *Sci. Data*, 4, 170165, <https://doi.org/10.1038/sdata.2017.165>, 2017.
